# Supplementary material
Source: publisher figshare collection journal article supplement (https://tandf.figshare.com/ndownloader/files/17513465)
Supplement: Supplementary file 1 [file 17513465]

**Involvement of NF-κB signaling pathway in the regulation of PRKAA1-mediated tumorigenesis in gastric cancer**

**Gastric cancer**

Yangmei Zhang1*, Xichang Zhou2*, Qinglin Zhang3, Youwei Zhang1, Xiang Wang1#, Long Cheng2#

1Department of Oncology, Xuzhou Central Hospital, Xuzhou Medical University, Xuzhou, Jiangsu, 221000, China

2Department of Cancer Diagnosis and Treatment Center, Xuzhou Central Hospital, Xuzhou Medical University, Xuzhou, Jiangsu, 221000, China

3Department of Central Laboratory, Xuzhou Central Hospital, Xuzhou Medical University, Xuzhou, Jiangsu, 221000, China

* Those authors contributed equally to this work

**#Corresponding authors**

Xiang Wang, Department of Oncology, Xuzhou Central Hospital, Xuzhou Medical University, 199 South Jiefang Road, Quanshan District, Xuzhou, Jiangsu, 221000, China. Tel: +86-0516-83956345; E-mail: wangxiang7726@163.com

Long Cheng, Department of Cancer Diagnosis and Treatment Center, Xuzhou Central Hospital, Xuzhou Medical University, 199 South Jiefang Road, Quanshan District, Xuzhou, Jiangsu, 221000, China. Tel: +86-0516-83956166; E-mail: [chenglong19750802@163.com](mailto:chenglong19750802@163.com)

**Running head: PRKAA1 and NF-κB signaling**

**
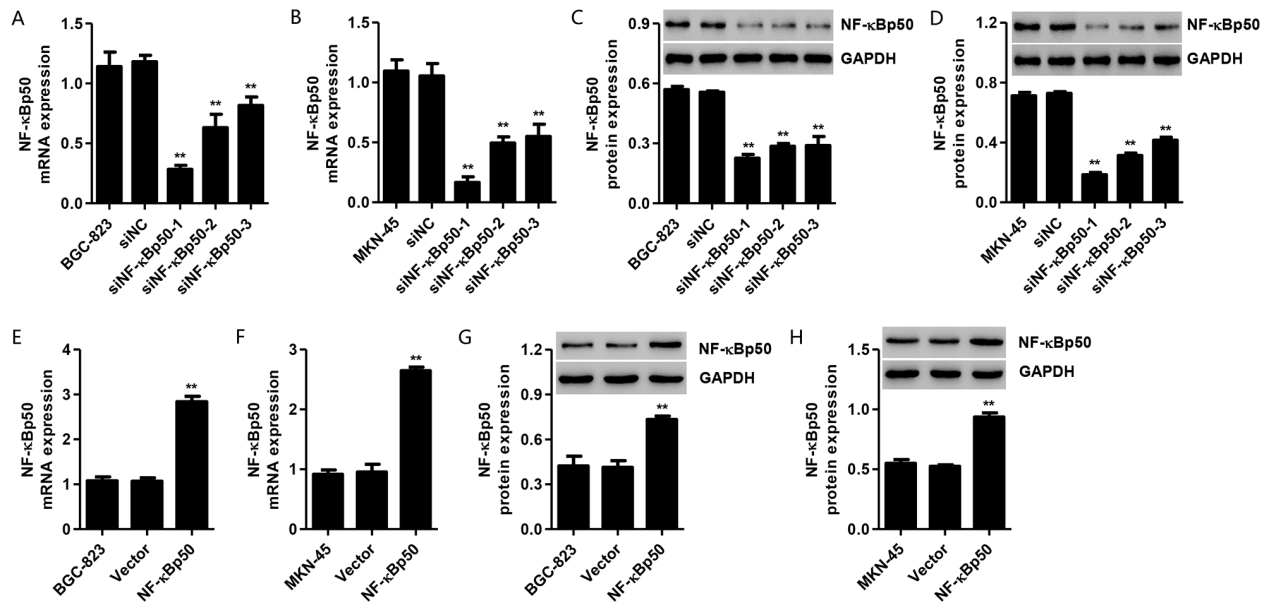
**

**Figure S1.** NF-κBp50 knockdown and overexpression in GC cell lines. BGC-823 and MKN-45 cells were transfected with siRNA targeting NF-κBp50, and the expression levels of NF-κBp50 were measured by Quantitative Real-time PCR (A, B) and Western blot assay (C, D), respectively. BGC-823 and MKN-45 cells were infected with pLVX-Puro-NF-κBp50 and the expression of NF-κBp50 was measured by Quantitative Real-time PCR (E, F) and Western blot assay (G, H), respectively. ***P*<0.01 compared with corresponding siNC or Vector.

**
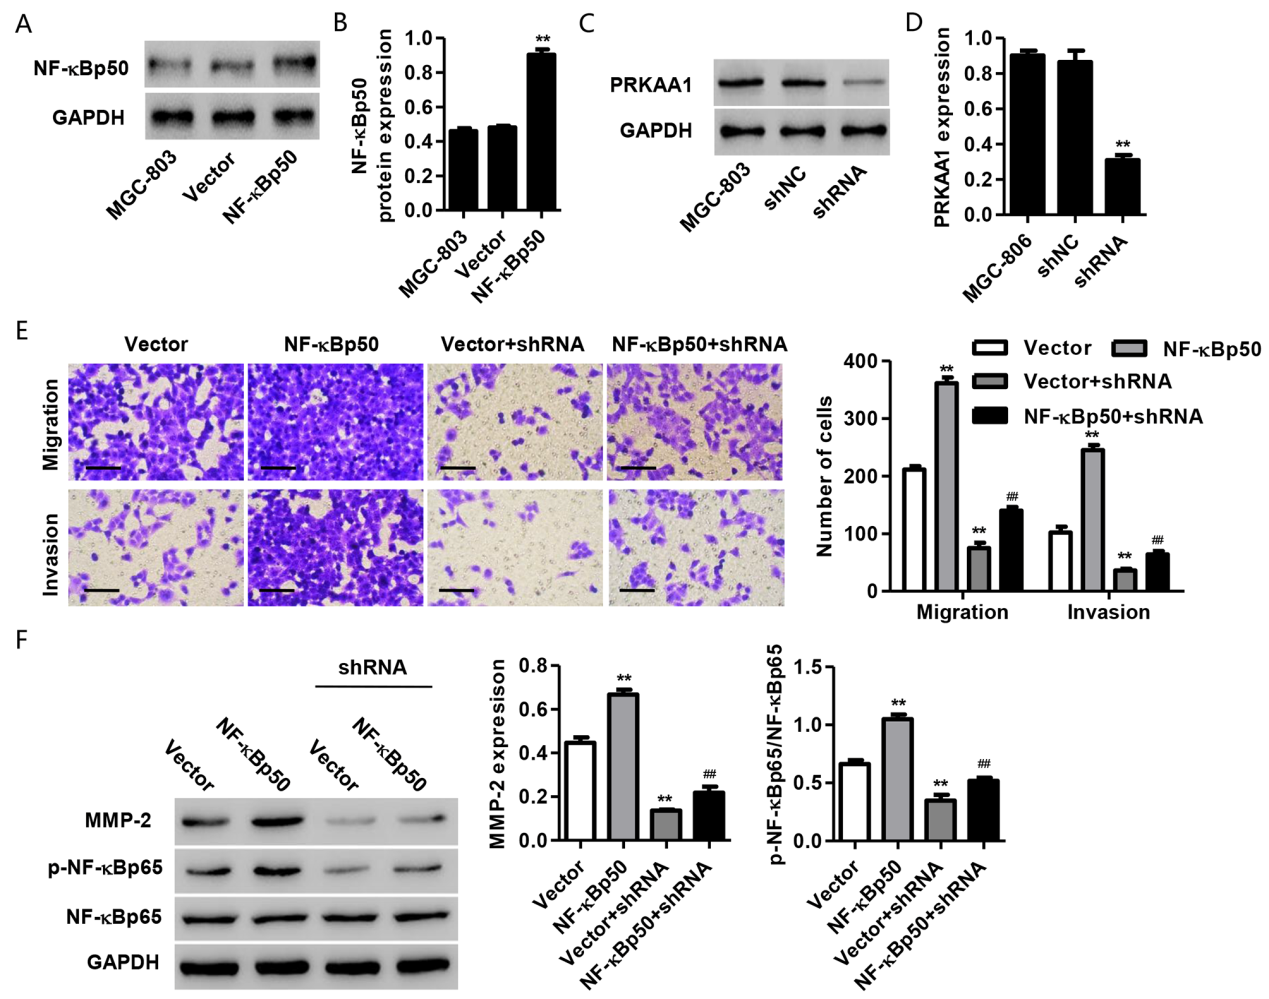
**

**Figure S2.** PRKAA1 silencing inhibits NF-κBp50 overexpression-mediated GC cell migration and invasion. NF-κBp50 overexpression in MGC-803 cells significantly increased the NF-κBp50 protein expression (A, B). PRKAA1 knockdown in MGC-803 cells significantly decreased the PRKAA1 protein expression (C, D). MGC-803 cells were infected with pLVX-Puro-NF-κBp50 in the absence or presence of PRKAA1-shRNA transfection. Transwell assay was performed for examining the cell migration and invasion (E), and the protein expression of MMP-2, p-NF-κBp65 and NF-κBp65 was measured by Western blotting (F). Scale bars: 100 μm. ***P*<0.01 compared with corresponding Vector or shNC. ##*P*<0.01 compared with NF-κBp50.
